# Supplementary material for: The magnetic assembly of polymer colloids in a ferrofluid and its display applications
Source: Royal Society of Chemistry journal article supplement (doi:10.1039/c2nr12024k), 2012-01-01
Supplement: c2nr12024k.pdf [file c2nr12024k.pdf]

## Supporting Information

### Magnetic Assembly of Polymer Colloids in Ferrofluid and Its Display Applications

Jing Liu, Yiwu Mao, and Jianping Ge\*

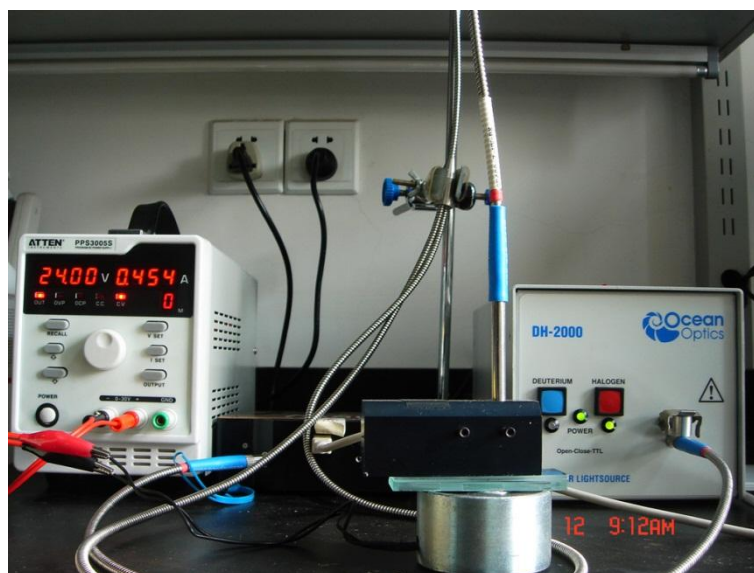

**Figure S1.** Experimental setup for measuring the reflection spectra of magnetically controlled display unit. The magnetic field with controlled strength was created by electromagnet and DC power source. Reflection spectra were measured by Ocean Optics spectrometer.

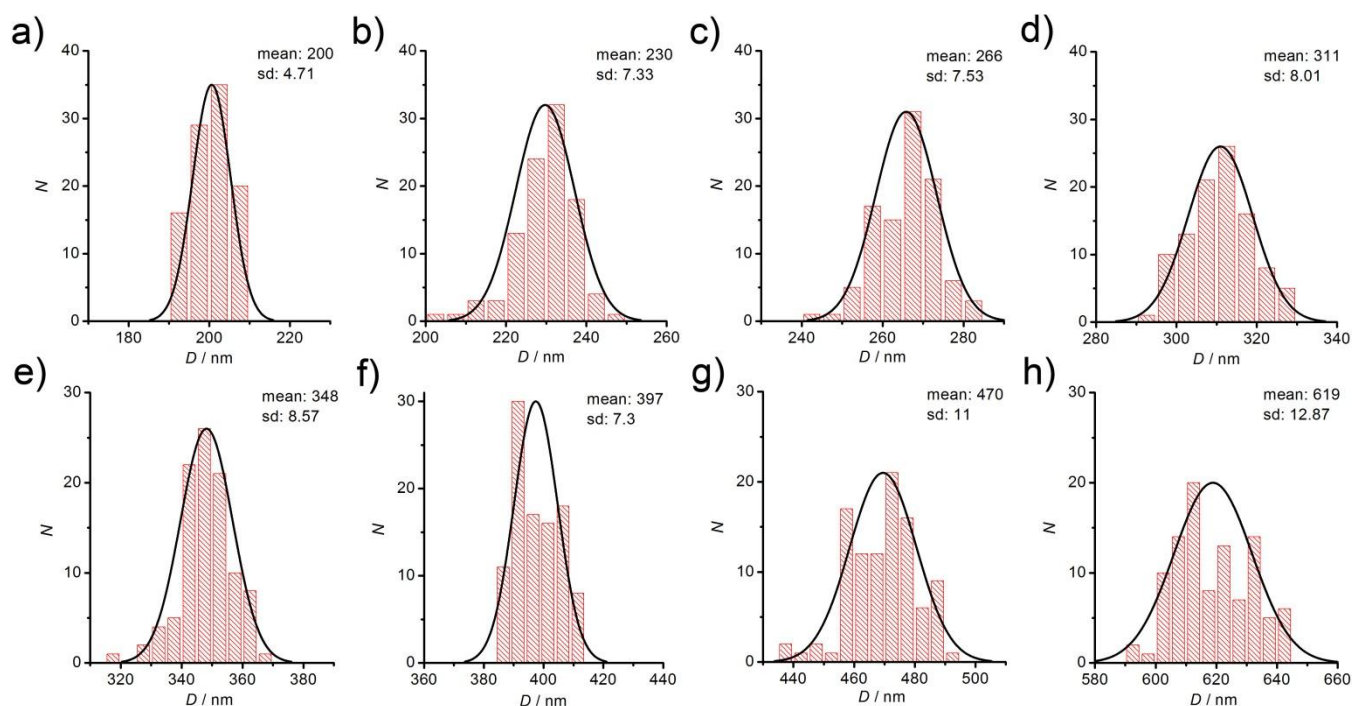

**Figure S2.** Average diameter, standard deviation and size distribution for all PS samples based on the statistics of 100 particles in TEM images.

## Calculation of lattice constant (d)

**Model 1: PS particles form 3D closepack colloidal crystals and the reflection originates from the interference of the incident light with (111) crystal facet.** The reflection wavelength ( $\lambda$ ) can be calculated with Equation (1), where  $m$  is the reflection order,  $D$  is the center-to-center distance between nearest spheres,  $n_i$  and  $V_i$  are, respectively, refractive index and volume fraction of each component, and  $\phi$  is the angle between the incident light and the sample normal.

$$m\lambda = \sqrt{\frac{8}{3}} D \left( \sum_i n_i^2 V_i - \sin^2 \phi \right)^{1/2} \quad (1)$$

$$m\lambda = \sqrt{\frac{8}{3}} D \left( n_{PS}^2 V_{PS} + n_{ferrofluid}^2 V_{ferrofluid} \right)^{1/2} \quad (2)$$

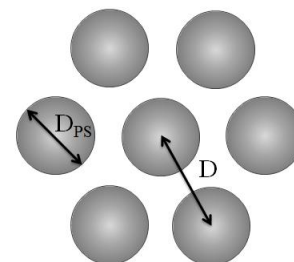

The refractive index of water, magnetite, and PS are 1.33, 2.42, and 1.55 respectively. The refractive index of ferrofluid ( $\text{Fe}_3\text{O}_4\% = 2\%$ ) is calculated to be 1.36.  $\phi$  equals to 0 in our measurements, which turns Equation (1) to Equation (2). In closepack colloidal crystals,  $V_{PS}$  and  $V_{ferrofluid}$  equal to 74% and 26%, respectively. The center-to-center distance between nearest PS particles can be roughly calculated, and the results (marked in red) are summarized in the following table.

| $D_{PS}$ | $\lambda_1$ | $D$ calculate by $\lambda_1$ | $\lambda_2$ | $D$ calculated by $\lambda_2$ |
|----------|-------------|------------------------------|-------------|-------------------------------|
| 230      | 680         | 277                          |             |                               |
| 266      | 742         | 302                          |             |                               |
| 311      | 880         | 359                          | 465         | 379                           |
| 348      | 1032        | 421                          | 539         | 439                           |
| 397      |             |                              | 580         | 473                           |
| 470      |             |                              | 690         | 562                           |
| 619      |             |                              | 920         | 750                           |

The center-to-center distance between nearest PS particles are larger than the PS diameter, which shows the PS particles do not contact to each other. Therefore, the  $V_{PS}$  and  $V_{ferrofluid}$  should be decreased and increased, and the results should be recalculated accordingly. Therefore, the real center-to-center distance ( $D$ ) should be slightly larger than the results listed in the above table to satisfy equation (2). The results also require the PS particles to fix or vibrate around the lattice point, if the colloid crystal expands without changing the symmetry.

**Model 2: PS particles form chain structures, which further aggregate to bundles, and the reflection originates from the periodic spacing between the neighbouring PS particles.** The reflection wavelength ( $\lambda$ ) can be calculated with Equation (3), where  $m$  is the order of diffraction,  $n$  is the effective refractive index of the system composed of colloids and solution,  $d$  is the spacing between the planes in lattice, and  $\theta$  is the glancing angle between the incident light and diffraction crystal planes.

$$m\lambda = 2n_{\text{eff}}d \sin \theta \quad (3)$$

$$m\lambda = 2(n_{\text{PS}}^2 V_{\text{PS}} + n_{\text{ferrofluid}}^2 V_{\text{ferrofluid}})^{1/2} d$$

$$V_{\text{PS}} = \frac{4}{3} \pi \left( \frac{D_{\text{PS}}}{2} \right)^3 \div (D^2 d) = \frac{\pi D_{\text{PS}}}{6d}$$

$$V_{\text{ferrofluid}} = 1 - \frac{\pi D_{\text{PS}}}{6d}$$

$$\left( \frac{m\lambda}{2d} \right)^2 = 1.55^2 \times \frac{\pi D_{\text{PS}}}{6d} + 1.36^2 \times \left( 1 - \frac{\pi D_{\text{PS}}}{6d} \right)$$

$$\left( \frac{m\lambda}{2d} \right)^2 = 0.2895 \times \frac{D_{\text{PS}}}{d} + 1.36^2 \quad (4)$$

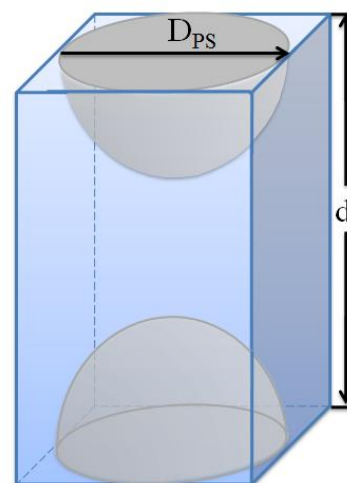

With  $\theta$  set to 0, Equation (3) can lead to Equation (4) for practical calculation of  $d$ , with known  $m$ ,  $\lambda$ , and  $D_{\text{PS}}$ . The results (marked in red) are summarized in the following table.

| $D_{\text{PS}}$ | $\lambda_1$ | $d_1$ calculate<br>by $\lambda_1$ | $\lambda_2$ | $d_2$ calculated<br>by $\lambda_2$ | $\lambda_3$ | $d_3$ calculated<br>by $\lambda_3$ |
|-----------------|-------------|-----------------------------------|-------------|------------------------------------|-------------|------------------------------------|
| 230             | 680         | 233                               |             |                                    |             |                                    |
| 266             | 742         | 253                               |             |                                    |             |                                    |
| 311             | 880         | 300                               | 465         | 318                                |             |                                    |
| 348             | 1032        | 353                               | 539         | 370                                |             |                                    |
| 397             |             |                                   | 580         | 397                                |             |                                    |
| 470             |             |                                   | 690         | 472                                | 475         | 488                                |
| 619             |             |                                   | 920         | 630                                | 632         | 650                                |

The lattice constant is equal to or slightly larger than the diameter of PS particles, showing the PS particle softly contacts to each other, which is consistent with the phenomenon that increasing the external field will not blueshift the reflection wavelength anymore. Compared with Model 1, Model 2 leads to reasonable results.

## Comparing the measured reflection wavelength with the calculated results

Base on the above calculations, it is known that the lattice constant is equal to or slightly larger than the diameter of PS particles, which depends on the surface repulsion and the ionic strength of the mixture. The average lattice constant ( $d$ ) can be determined by considering all the results calculated from 1<sup>st</sup>, 2<sup>nd</sup> and 3<sup>rd</sup> order reflection, which are listed below. As  $D_{PS}$  approximately equals to  $d$ , Equation 4 can be simplified to Equation 5. The results are summarized in the following table.

$$d = \frac{\sum_i d_i}{i}$$

$$\frac{m\lambda}{2d} = 1.4626 \quad (5)$$

| $D_{PS}$ | Average<br>$d$ | Measured<br>$\lambda_1$ | calculated<br>$\lambda_1$ | Measured<br>$\lambda_2$ | calculated<br>$\lambda_2$ | Measured<br>$\lambda_3$ | calculated<br>$\lambda_3$ |
|----------|----------------|-------------------------|---------------------------|-------------------------|---------------------------|-------------------------|---------------------------|
| 230      | 233            | 680                     | 682                       |                         |                           |                         |                           |
| 266      | 266*           | 742                     | 778                       |                         |                           |                         |                           |
| 311      | 311*           | 880                     | 910                       | 465                     | 455                       |                         |                           |
| 348      | 362            | 1032                    | 1059                      | 539                     | 529                       |                         |                           |
| 397      | 397            |                         |                           | 580                     | 581                       |                         |                           |
| 470      | 480            |                         |                           | 690                     | 702                       | 475                     | 468                       |
| 619      | 640            |                         |                           | 920                     | 936                       | 632                     | 624                       |

\*the average  $d$  takes the value of particle diameter, when it is smaller than  $D_{PS}$
